# Supplementary material
Source: PubMed Central journal article supplement (PMC6898679)
Supplement: 41386_2019_414_MOESM1_ESM.pdf [file 41386_2019_414_MOESM1_ESM.pdf]

Supplementary Information

**Oxytocin receptor DNA methylation and alterations of brain volumes in maltreated children**

Takashi X. Fujisawa, Shota Nishitani, Shinichiro Takiguchi, Koji Shimada, Alicia K. Smith, Akemi Tomoda

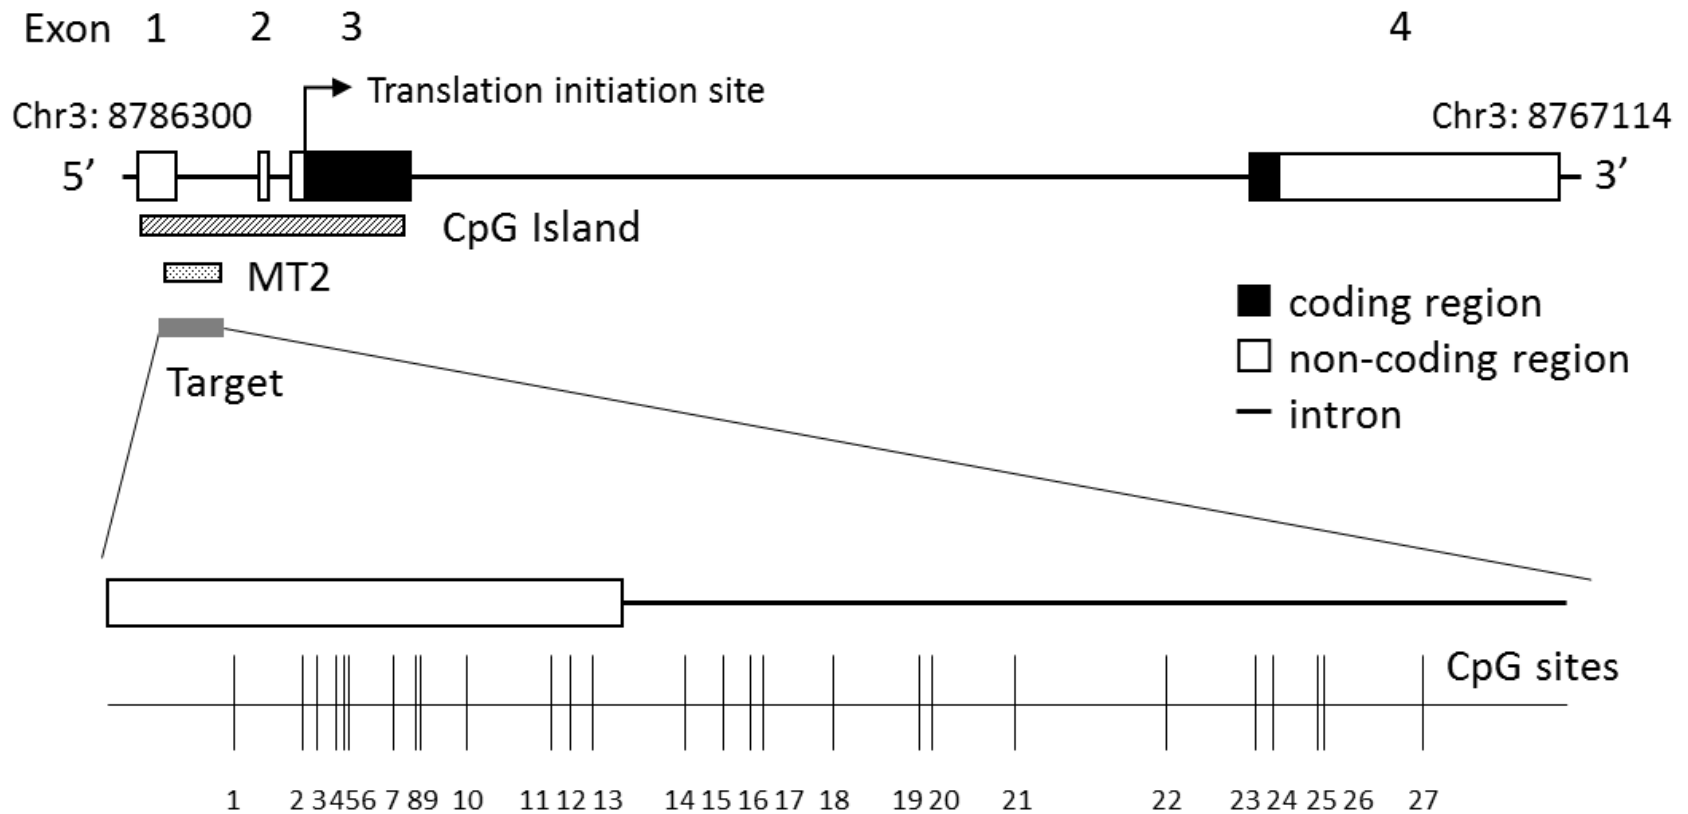

**Fig S1.** Gene structure of *OXTR* (chr3: 8,792,095-8,811,300; GRCh37/hg19 build). Methylation of the MT2 region suppresses transcription in a human hepatoblastoma cell line<sup>56</sup>. The location of 27 CpG sites in this study are indicated.

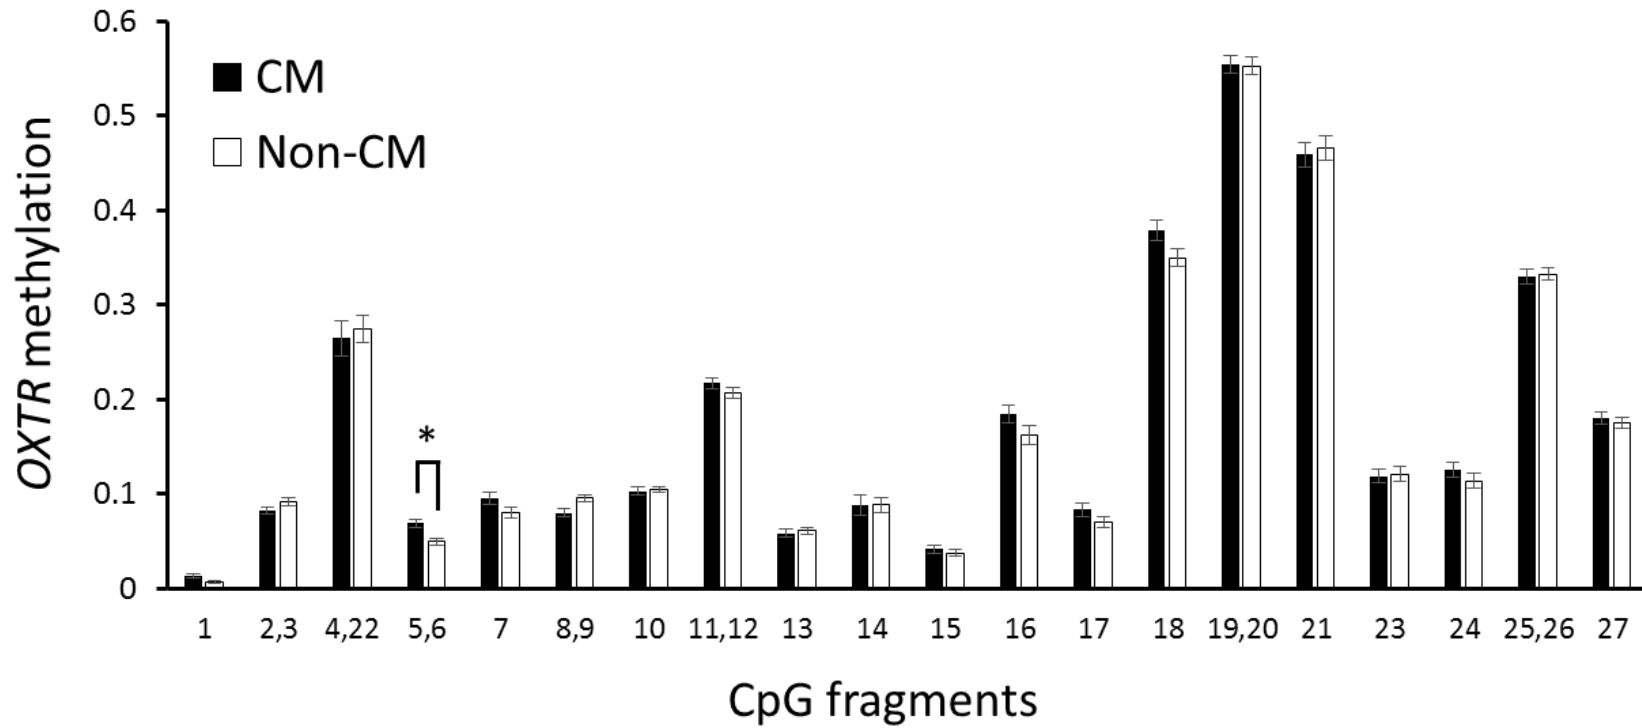

**Fig. S2** Group comparison of *OXTR* methylation. The CM and Non-CM groups were compared using *t*-test ( $\alpha = 0.05 / 20$ , Bonferroni correction). \*:  $P_{corr} < 0.05$ . Error bars indicate SE.

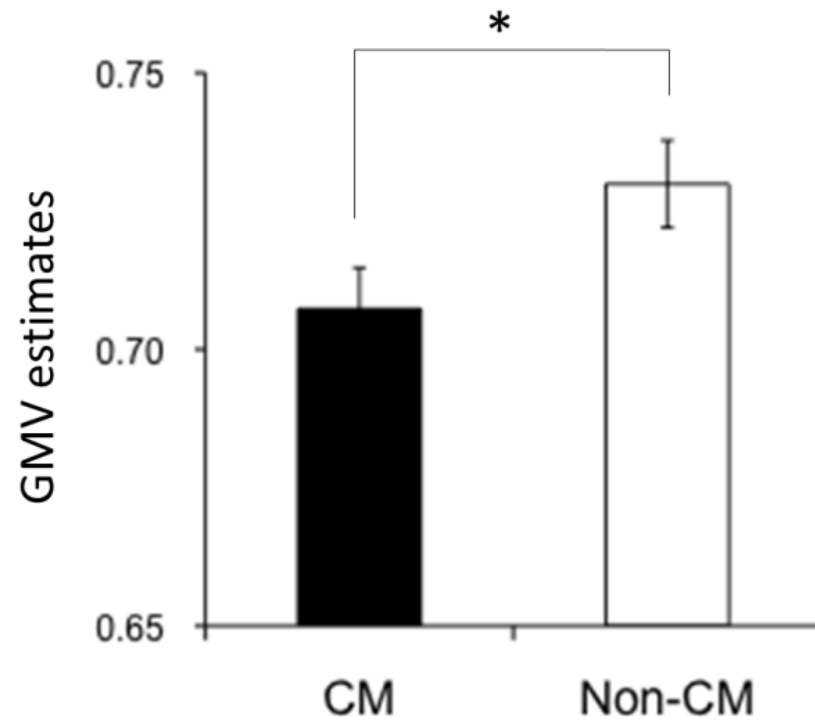

**Fig. S3** Structural differences in GMV in the left orbitofrontal cortex ( $x, y, z = -27, 54, -12$  [BA 11]) between the CM and Non-CM groups.

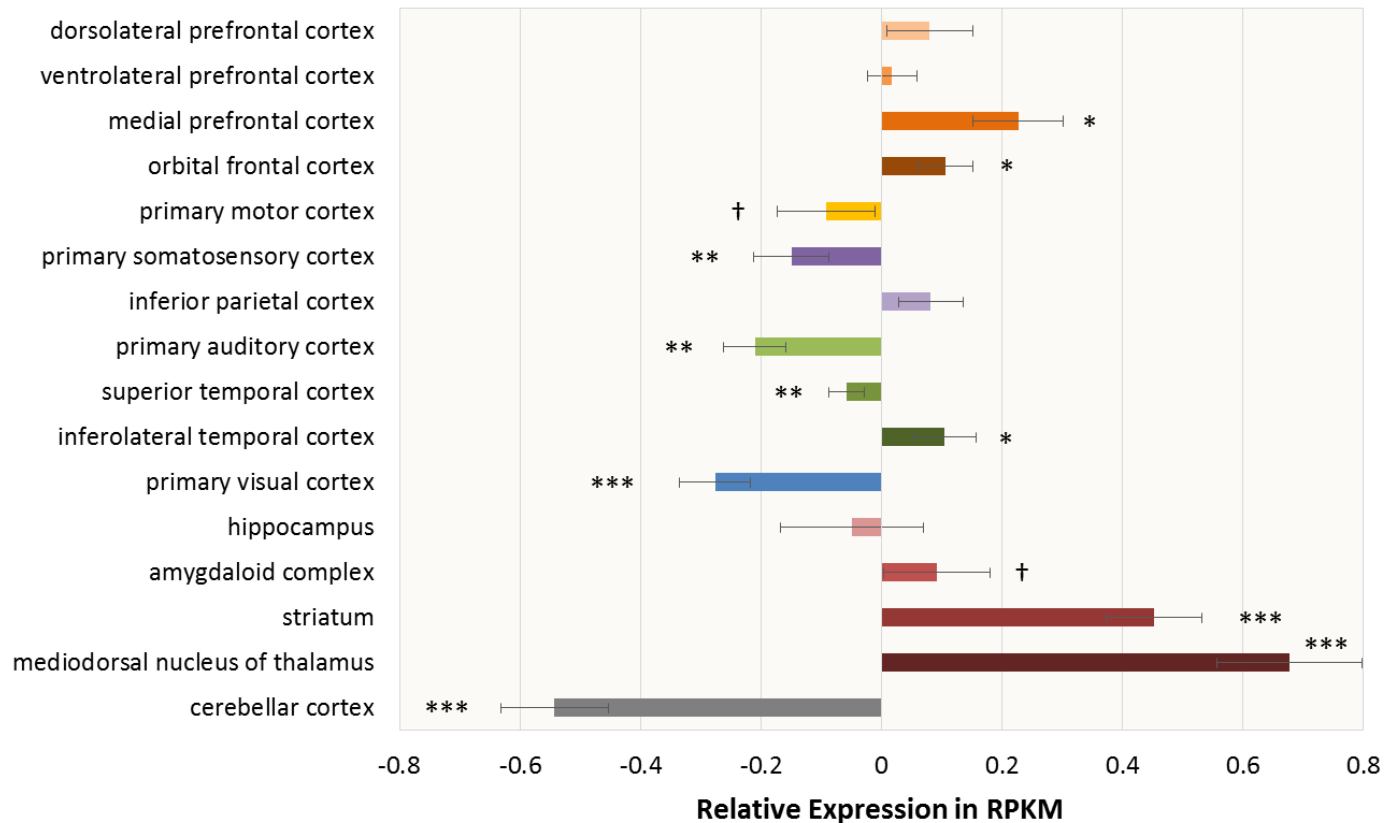

**Fig. S4** Relative gene expression of *OXTR* in the human brain. The figure shows the *OXTR* gene expression measured via RNA-seq in BrainSpan (<http://www.brainspan.org>) datasets ( $n = 16$ ; mean age:  $12.3 \pm 8.4$ ; age range: 1-30 years). The relative expression level of each brain region was derived by the mean-centering of all brain regions for each individual (mean = 0), and the value of each brain area was tested for the difference from the 0 level. The striatum, thalamus, and cortical regions such as the medial prefrontal, orbital frontal, and inferolateral temporal cortices exhibit significantly higher *OXTR* expression than other brain regions. †  $P < 0.10$ , \*  $P < 0.05$ , \*\*  $P < 0.01$ , \*\*\*  $P < 0.001$ , 2-tailed. Error bars represent standard errors of the mean.
